# Supplementary material for: On-chip evaluation of platelet adhesion and aggregation upon exposure to mesoporous silica nanoparticles
Source: Royal Society of Chemistry journal article supplement (doi:10.1039/c3an01679j), 2013-11-26
Supplement: c3an01679j.pdf [file c3an01679j.pdf]

1 **On-chip Evaluation of Platelet Adhesion and Aggregation upon Exposure to**  
2 **Mesoporous Silica Nanoparticles**

3 Donghyuk Kim<sup>a</sup>, Solaire Finkenstaedt-Quinn, Katie R. Hurley, Joseph T. Buchman, and  
4 Christy L. Haynes<sup>\*a</sup>

5 <sup>a</sup> University of Minnesota, Department of Chemistry, 207 Pleasant St SE, Minneapolis,  
6 Minnesota, United States. E-mail: [chaynes@umn.edu](mailto:chaynes@umn.edu)

7

8 Supporting Information (SI) – Experimental Procedures and Supplemental Data

9

10 I. Supplemental Data

11 1. S1. Off-chip aggregation assay results by fixed-cell fluorescence imaging

12

13

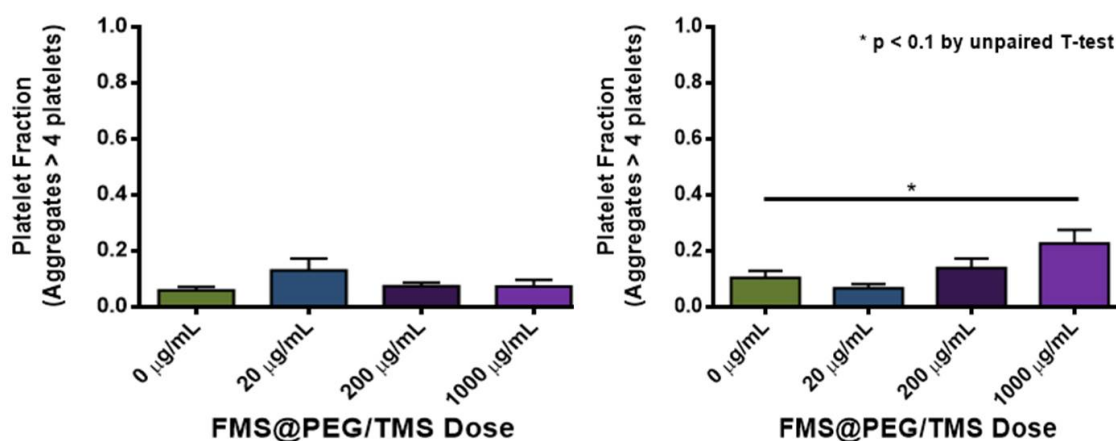

14

15 Figure S1. Aggregation of more than 4 platelets. (a) unactivated platelets and (b) ADP-activated  
16 platelets obtained from fixed-cell fluorescence imaging.

17

18 II. Supplemental Information

19 1. Nanoparticle number density calculation

20 First, with an assumption of nanoparticle shape to be a hexagonal prism, total volume  
21 of a single FMS nanoparticle can be obtained by

22

$$= 6 \times \frac{\sqrt{3}}{4} \times L^2 \times H$$

where L is the length of a side, and H is the height of the hexagon. From TEM imaging, L and H values are determined to be 24 nm and 48 nm, respectively.

Thus, calculated volume of a single nanoparticle is:

$$= 6 \times \frac{\sqrt{3}}{4} \times (24 \times 10^{-7})^2 \times (48 \times 10^{-7}) = 7.182 \times 10^{-17} \frac{\text{cm}^3}{\# \text{ of NP}}$$

Density of amorphous silica is 2.2 (g/cm<sup>3</sup>) and primary pore volume is 0.81 (cm<sup>3</sup>/g); thus, the number density of the FMS nanoparticles per gram (x) can be calculated by:

$$x = \frac{\left[ \frac{1}{2.2} \left( \frac{\text{cm}^3}{\text{g}} \right) + 0.81 \left( \frac{\text{cm}^3}{\text{g}} \right) \right]}{7.182 \times 10^{-17} \left( \frac{\text{cm}^3}{\# \text{ of NP}} \right)}$$
$$= 1.761 \times 10^{16} \left( \frac{\# \text{ of NP}}{\text{g}} \right)$$

Thus, assuming 1 μm as diffusion length of nanoparticles during experiments and 2.5 μm as an average diameter of each platelet, the number density of FMS nanoparticles around a single platelet can be obtained by:

$$\frac{4}{3} \pi [(3.5 \times 10^{-6})^3 - (2.5 \times 10^{-6})^3] \times 10^3 (\text{L}) \times 1000 \times 10^{-3} \left( \frac{\text{g}}{\text{L}} \right) \times 1.761 \times 10^{16} \left( \frac{\# \text{ of NP}}{\text{g}} \right)$$

in the case of 1000 μg/mL FMS nanoparticle concentration. Thus, number densities of FMS nanoparticles surrounding individual platelets are 40, 402, and 2009 nanoparticles for 20 μg/mL, 200 μg/mL, and 1000 μg/mL concentrations, respectively.
